# Supplementary material
Source: PubMed Central journal article supplement (PMC6689134)
Supplement: NIHMS1533970-supplement-1.pdf [file NIHMS1533970-supplement-1.pdf]

# **SUPPLEMENT**

## **PERINATAL DIAZINON EXPOSURE COMPROMISES THE DEVELOPMENT OF ACETYLCHOLINE AND SEROTONIN SYSTEMS**

Theodore A. Slotkin, Samantha Skavicus, Ashley Ko,  
Edward D. Levin and Frederic J. Seidler

### **Contents:**

Table S1. Body and brain region weights

Table S2. HC3 binding

Table S3. ChAT activity

Table S4. HC3/ChAT ratio

Table S5. nAChR binding

Table S6. 5HT receptor binding

**TABLE S1: Body and Brain Region Weights (mean  $\pm$  SE)**

|                           | Postnatal Age (days) | Male         |                    |                  | Female       |                    |                  |
|---------------------------|----------------------|--------------|--------------------|------------------|--------------|--------------------|------------------|
|                           |                      | Control      | Diazinon 0.5 mg/kg | Diazinon 1 mg/kg | Control      | Diazinon 0.5 mg/kg | Diazinon 1 mg/kg |
| <b>Body Weight (g)</b>    | 30                   | 124 $\pm$ 4  | 123 $\pm$ 6        | 119 $\pm$ 6      | 107 $\pm$ 6  | 106 $\pm$ 5        | 102 $\pm$ 4      |
|                           | 60                   | 356 $\pm$ 11 | 335 $\pm$ 9        | 363 $\pm$ 11     | 222 $\pm$ 7  | 226 $\pm$ 5        | 224 $\pm$ 6      |
|                           | 100                  | 517 $\pm$ 13 | 467 $\pm$ 8        | 501 $\pm$ 9      | 275 $\pm$ 11 | 280 $\pm$ 5        | 272 $\pm$ 6      |
|                           | 150                  | 580 $\pm$ 13 | 569 $\pm$ 18       | 553 $\pm$ 10     | 300 $\pm$ 12 | 301 $\pm$ 9        | 316 $\pm$ 10     |
| <b>Region Weight (mg)</b> |                      |              |                    |                  |              |                    |                  |
| frontal/parietal cortex   | 30                   | 222 $\pm$ 7  | 243 $\pm$ 6        | 239 $\pm$ 12     | 226 $\pm$ 9  | 223 $\pm$ 8        | 239 $\pm$ 7      |
|                           | 60                   | 268 $\pm$ 7  | 249 $\pm$ 11       | 261 $\pm$ 8      | 242 $\pm$ 9  | 253 $\pm$ 8        | 256 $\pm$ 6      |
|                           | 100                  | 275 $\pm$ 8  | 272 $\pm$ 10       | 269 $\pm$ 10     | 250 $\pm$ 8  | 255 $\pm$ 9        | 264 $\pm$ 5      |
|                           | 150                  | 270 $\pm$ 5  | 253 $\pm$ 9        | 271 $\pm$ 8      | 269 $\pm$ 11 | 258 $\pm$ 9        | 261 $\pm$ 5      |
| temporal/occipital cortex | 30                   | 159 $\pm$ 6  | 147 $\pm$ 6        | 177 $\pm$ 9      | 153 $\pm$ 8  | 165 $\pm$ 5        | 155 $\pm$ 4      |
|                           | 60                   | 181 $\pm$ 9  | 194 $\pm$ 8        | 195 $\pm$ 7      | 171 $\pm$ 7  | 171 $\pm$ 8        | 174 $\pm$ 8      |
|                           | 100                  | 189 $\pm$ 6  | 192 $\pm$ 12       | 194 $\pm$ 5      | 184 $\pm$ 7  | 175 $\pm$ 5        | 181 $\pm$ 6      |
|                           | 150                  | 177 $\pm$ 10 | 194 $\pm$ 7        | 199 $\pm$ 4      | 179 $\pm$ 5  | 175 $\pm$ 6        | 190 $\pm$ 8      |
| hippocampus               | 30                   | 130 $\pm$ 4  | 126 $\pm$ 5        | 135 $\pm$ 3      | 139 $\pm$ 4  | 132 $\pm$ 6        | 132 $\pm$ 4      |
|                           | 60                   | 147 $\pm$ 5  | 161 $\pm$ 5        | 160 $\pm$ 4      | 132 $\pm$ 6  | 141 $\pm$ 4        | 144 $\pm$ 4      |
|                           | 100                  | 171 $\pm$ 6  | 163 $\pm$ 6        | 160 $\pm$ 6      | 150 $\pm$ 3  | 149 $\pm$ 6        | 152 $\pm$ 4      |
|                           | 150                  | 156 $\pm$ 5  | 167 $\pm$ 2        | 165 $\pm$ 6      | 153 $\pm$ 5  | 147 $\pm$ 5        | 153 $\pm$ 3      |
| striatum                  | 30                   | 92 $\pm$ 6   | 89 $\pm$ 5         | 92 $\pm$ 7       | 79 $\pm$ 4   | 88 $\pm$ 5         | 82 $\pm$ 3       |
|                           | 60                   | 109 $\pm$ 7  | 104 $\pm$ 3        | 109 $\pm$ 6      | 95 $\pm$ 6   | 94 $\pm$ 4         | 93 $\pm$ 7       |
|                           | 100                  | 110 $\pm$ 9  | 104 $\pm$ 7        | 114 $\pm$ 8      | 96 $\pm$ 4   | 101 $\pm$ 4        | 106 $\pm$ 4      |
|                           | 150                  | 112 $\pm$ 5  | 113 $\pm$ 6        | 116 $\pm$ 7      | 94 $\pm$ 3   | 102 $\pm$ 4        | 110 $\pm$ 7      |
| midbrain                  | 30                   | 281 $\pm$ 9  | 282 $\pm$ 7        | 290 $\pm$ 8      | 276 $\pm$ 5  | 272 $\pm$ 3        | 279 $\pm$ 6      |
|                           | 60                   | 336 $\pm$ 12 | 326 $\pm$ 10       | 337 $\pm$ 9      | 316 $\pm$ 11 | 301 $\pm$ 8        | 322 $\pm$ 7      |
|                           | 100                  | 361 $\pm$ 5  | 341 $\pm$ 16       | 390 $\pm$ 9      | 331 $\pm$ 11 | 333 $\pm$ 7        | 342 $\pm$ 5      |
|                           | 150                  | 363 $\pm$ 9  | 365 $\pm$ 4        | 375 $\pm$ 6      | 355 $\pm$ 9  | 339 $\pm$ 6        | 346 $\pm$ 9      |
| brainstem                 | 30                   | 157 $\pm$ 7  | 165 $\pm$ 4        | 168 $\pm$ 5      | 154 $\pm$ 6  | 155 $\pm$ 4        | 153 $\pm$ 5      |
|                           | 60                   | 220 $\pm$ 6  | 220 $\pm$ 7        | 214 $\pm$ 7      | 192 $\pm$ 7  | 211 $\pm$ 9        | 196 $\pm$ 6      |
|                           | 100                  | 250 $\pm$ 7  | 243 $\pm$ 12       | 245 $\pm$ 7      | 233 $\pm$ 5  | 219 $\pm$ 7        | 213 $\pm$ 11     |
|                           | 150                  | 275 $\pm$ 9  | 270 $\pm$ 3        | 260 $\pm$ 7      | 242 $\pm$ 4  | 250 $\pm$ 8        | 255 $\pm$ 6      |

Data represent mean  $\pm$  SE obtained from 5-9 animals in each treatment group for each age and sex. For body weight, three-factor ANOVA (treatment, age, sex) indicates no significant treatment effects or interactions of treatment with the other factors. Across a larger cohort (all animals, not just those used for neurochemical determinations), there were slightly higher body weights (2-3%) in the diazinon groups compared to control ( $p < 0.02$ ) in the preweaning period but not after weaning (data not shown).

For brain region weight, four-factor ANOVA (treatment, age, sex, region) indicates a significant main treatment effect ( $p < 0.002$ ) but no interactions of treatment with the other factors. The diazinon 1 mg/kg group was significantly different ( $p < 0.01$ ) from either the control or low dose diazinon groups, representing an overall increase of approximately 2%.

Note that weights for frontal/parietal cortex and temporal/occipital cortex are for the right hemisphere only, the portion used in this study.

**TABLE S2: HC3 Binding (mean ± SE)**

| Region                    | Postnatal Age (days) | Male (fmol/mg protein) |                    |                  | Female (fmol/mg protein) |                    |                  |
|---------------------------|----------------------|------------------------|--------------------|------------------|--------------------------|--------------------|------------------|
|                           |                      | Control                | Diazinon 0.5 mg/kg | Diazinon 1 mg/kg | Control                  | Diazinon 0.5 mg/kg | Diazinon 1 mg/kg |
| frontal/parietal cortex   | 30                   | 17.8 ± 0.8             | 16.7 ± 0.7         | 16.7 ± 1.2       | 20.3 ± 0.6               | 17.7 ± 1.5         | 16.7 ± 1.0       |
|                           | 60                   | 20.4 ± 1.1             | 20.5 ± 2.2         | 18.1 ± 1.2       | 22.0 ± 1.3               | 19.5 ± 1.7         | 20.0 ± 1.3       |
|                           | 100                  | 20.3 ± 1.1             | 20.9 ± 1.1         | 18.3 ± 1.1       | 23.2 ± 1.4               | 19.5 ± 0.7         | 20.5 ± 1.2       |
|                           | 150                  | 19.6 ± 1.2             | 18.1 ± 1.3         | 18.8 ± 0.7       | 20.0 ± 1.1               | 19.0 ± 0.8         | 19.6 ± 0.6       |
| temporal/occipital cortex | 30                   | 11.5 ± 0.6             | 10.4 ± 0.6         | 9.9 ± 0.3        | 12.6 ± 1.0               | 11.7 ± 0.9         | 10.9 ± 0.6       |
|                           | 60                   | 12.0 ± 0.4             | 11.0 ± 0.4         | 8.8 ± 0.5        | 12.4 ± 0.7               | 10.6 ± 0.8         | 11.5 ± 0.9       |
|                           | 100                  | 12.4 ± 0.8             | 13.2 ± 0.7         | 11.7 ± 0.8       | 13.9 ± 0.7               | 12.1 ± 0.7         | 12.0 ± 0.4       |
|                           | 150                  | 13.2 ± 0.6             | 12.2 ± 0.4         | 11.9 ± 0.5       | 13.7 ± 0.7               | 12.6 ± 0.4         | 12.6 ± 0.5       |
| hippocampus               | 30                   | 16.6 ± 0.6             | 14.9 ± 1.0         | 14.9 ± 1.2       | 16.1 ± 0.5               | 14.6 ± 1.1         | 14.8 ± 1.0       |
|                           | 60                   | 15.9 ± 0.6             | 15.1 ± 1.4         | 11.9 ± 0.6       | 15.6 ± 1.3               | 14.1 ± 1.2         | 13.7 ± 1.1       |
|                           | 100                  | 17.2 ± 0.8             | 18.6 ± 0.9         | 17.7 ± 1.1       | 19.9 ± 1.2               | 19.3 ± 0.7         | 17.3 ± 1.0       |
|                           | 150                  | 15.4 ± 0.8             | 14.0 ± 0.5         | 13.1 ± 0.4       | 15.2 ± 0.5               | 14.0 ± 0.7         | 14.1 ± 0.6       |
| striatum                  | 30                   | 88 ± 5                 | 91 ± 6             | 94 ± 6           | 86 ± 9                   | 85 ± 6             | 94 ± 6           |
|                           | 60                   | 84 ± 2                 | 88 ± 7             | 76 ± 3           | 94 ± 6                   | 80 ± 3             | 84 ± 6           |
|                           | 100                  | 81 ± 5                 | 90 ± 4             | 80 ± 4           | 82 ± 4                   | 83 ± 4             | 84 ± 3           |
|                           | 150                  | 81 ± 3                 | 79 ± 2             | 79 ± 3           | 84 ± 2                   | 82 ± 3             | 74 ± 3           |
| midbrain                  | 30                   | 14.9 ± 0.9             | 16.0 ± 0.9         | 12.6 ± 0.6       | 15.5 ± 0.7               | 14.0 ± 1.0         | 14.4 ± 0.7       |
|                           | 60                   | 14.8 ± 0.7             | 14.8 ± 0.4         | 13.0 ± 0.6       | 14.6 ± 1.0               | 13.5 ± 0.8         | 14.0 ± 0.6       |
|                           | 100                  | 12.5 ± 0.5             | 11.6 ± 0.5         | 12.1 ± 0.5       | 12.9 ± 0.8               | 11.3 ± 0.6         | 12.1 ± 0.5       |
|                           | 150                  | 13.7 ± 1.0             | 13.2 ± 0.9         | 13.7 ± 0.8       | 15.1 ± 0.8               | 13.6 ± 0.8         | 13.5 ± 0.5       |
| brainstem                 | 30                   | 10.3 ± 0.7             | 9.5 ± 0.2          | 8.7 ± 0.5        | 10.2 ± 0.4               | 8.9 ± 0.5          | 8.7 ± 0.4        |
|                           | 60                   | 9.5 ± 0.4              | 7.8 ± 0.3          | 9.3 ± 0.4        | 8.8 ± 0.5                | 9.7 ± 0.3          | 9.8 ± 0.3        |
|                           | 100                  | 8.5 ± 0.2              | 8.3 ± 0.4          | 7.9 ± 0.3        | 8.3 ± 0.3                | 7.8 ± 0.5          | 7.6 ± 0.4        |
|                           | 150                  | 7.2 ± 0.2              | 7.5 ± 0.6          | 7.3 ± 0.5        | 7.0 ± 0.3                | 7.2 ± 0.4          | 6.8 ± 0.4        |

Data represent mean ± SE obtained from 5-9 animals in each treatment group for each age and sex. Results of multivariate ANOVA are provided in the main text. Note that the assays for each region and age were run in separate experiments, so absolute values cannot be compared strictly across ages or between regions. Accordingly, statistical comparisons in the main text were conducted on log-transformed data, which evaluates the treatment differences as a proportion to control values, rather than as an arithmetic difference. Representing the data as proportional differences (percent control) enables a full comparison of treatment effects and treatment interactions with all the other variables, even though absolute values for the controls cannot be compared across regions and ages.

**TABLE S3: ChAT Activity (mean  $\pm$  SE)**

| Region                    | Postnatal Age (days) | Male (nmol/min per mg protein) |                    |                  | Female (nmol/min per mg protein) |                    |                  |
|---------------------------|----------------------|--------------------------------|--------------------|------------------|----------------------------------|--------------------|------------------|
|                           |                      | Control                        | Diazinon 0.5 mg/kg | Diazinon 1 mg/kg | Control                          | Diazinon 0.5 mg/kg | Diazinon 1 mg/kg |
| frontal/parietal cortex   | 30                   | 0.86 $\pm$ 0.04                | 0.89 $\pm$ 0.02    | 0.85 $\pm$ 0.04  | 0.94 $\pm$ 0.05                  | 0.92 $\pm$ 0.03    | 0.93 $\pm$ 0.05  |
|                           | 60                   | 0.94 $\pm$ 0.05                | 0.92 $\pm$ 0.06    | 0.97 $\pm$ 0.04  | 1.03 $\pm$ 0.04                  | 1.02 $\pm$ 0.06    | 0.93 $\pm$ 0.03  |
|                           | 100                  | 0.93 $\pm$ 0.06                | 0.94 $\pm$ 0.01    | 0.95 $\pm$ 0.05  | 1.02 $\pm$ 0.03                  | 0.96 $\pm$ 0.04    | 1.00 $\pm$ 0.03  |
|                           | 150                  | 0.87 $\pm$ 0.03                | 0.82 $\pm$ 0.03    | 0.85 $\pm$ 0.03  | 0.96 $\pm$ 0.04                  | 0.86 $\pm$ 0.02    | 0.88 $\pm$ 0.03  |
| temporal/occipital cortex | 30                   | 0.56 $\pm$ 0.02                | 0.56 $\pm$ 0.02    | 0.57 $\pm$ 0.01  | 0.61 $\pm$ 0.04                  | 0.55 $\pm$ 0.01    | 0.58 $\pm$ 0.01  |
|                           | 60                   | 0.75 $\pm$ 0.04                | 0.75 $\pm$ 0.03    | 0.70 $\pm$ 0.02  | 0.76 $\pm$ 0.04                  | 0.72 $\pm$ 0.03    | 0.70 $\pm$ 0.03  |
|                           | 100                  | 0.64 $\pm$ 0.02                | 0.65 $\pm$ 0.01    | 0.69 $\pm$ 0.03  | 0.68 $\pm$ 0.03                  | 0.68 $\pm$ 0.03    | 0.67 $\pm$ 0.03  |
|                           | 150                  | 0.71 $\pm$ 0.03                | 0.75 $\pm$ 0.03    | 0.72 $\pm$ 0.02  | 0.76 $\pm$ 0.03                  | 0.75 $\pm$ 0.02    | 0.72 $\pm$ 0.02  |
| hippocampus               | 30                   | 0.77 $\pm$ 0.03                | 0.75 $\pm$ 0.02    | 0.74 $\pm$ 0.03  | 0.80 $\pm$ 0.03                  | 0.72 $\pm$ 0.02    | 0.83 $\pm$ 0.02  |
|                           | 60                   | 0.82 $\pm$ 0.05                | 0.83 $\pm$ 0.05    | 0.81 $\pm$ 0.02  | 0.87 $\pm$ 0.03                  | 0.84 $\pm$ 0.03    | 0.79 $\pm$ 0.04  |
|                           | 100                  | 0.80 $\pm$ 0.03                | 0.85 $\pm$ 0.03    | 0.83 $\pm$ 0.03  | 0.85 $\pm$ 0.03                  | 0.84 $\pm$ 0.02    | 0.85 $\pm$ 0.02  |
|                           | 150                  | 0.79 $\pm$ 0.04                | 0.78 $\pm$ 0.03    | 0.80 $\pm$ 0.02  | 0.86 $\pm$ 0.02                  | 0.83 $\pm$ 0.03    | 0.80 $\pm$ 0.04  |
| striatum                  | 30                   | 1.78 $\pm$ 0.10                | 2.08 $\pm$ 0.05    | 2.03 $\pm$ 0.11  | 2.08 $\pm$ 0.09                  | 2.07 $\pm$ 0.07    | 2.27 $\pm$ 0.09  |
|                           | 60                   | 2.30 $\pm$ 0.13                | 2.39 $\pm$ 0.12    | 2.32 $\pm$ 0.12  | 2.29 $\pm$ 0.09                  | 2.35 $\pm$ 0.11    | 2.50 $\pm$ 0.08  |
|                           | 100                  | 2.22 $\pm$ 0.11                | 2.32 $\pm$ 0.05    | 2.29 $\pm$ 0.08  | 2.26 $\pm$ 0.08                  | 2.42 $\pm$ 0.10    | 2.22 $\pm$ 0.08  |
|                           | 150                  | 2.19 $\pm$ 0.13                | 2.15 $\pm$ 0.09    | 2.25 $\pm$ 0.12  | 2.12 $\pm$ 0.09                  | 2.19 $\pm$ 0.13    | 2.29 $\pm$ 0.05  |
| midbrain                  | 30                   | 0.65 $\pm$ 0.02                | 0.66 $\pm$ 0.01    | 0.69 $\pm$ 0.03  | 0.72 $\pm$ 0.03                  | 0.71 $\pm$ 0.02    | 0.72 $\pm$ 0.02  |
|                           | 60                   | 0.71 $\pm$ 0.03                | 0.69 $\pm$ 0.03    | 0.70 $\pm$ 0.02  | 0.70 $\pm$ 0.02                  | 0.71 $\pm$ 0.01    | 0.77 $\pm$ 0.02  |
|                           | 100                  | 0.71 $\pm$ 0.02                | 0.71 $\pm$ 0.02    | 0.75 $\pm$ 0.02  | 0.75 $\pm$ 0.03                  | 0.75 $\pm$ 0.03    | 0.77 $\pm$ 0.03  |
|                           | 150                  | 0.70 $\pm$ 0.02                | 0.72 $\pm$ 0.01    | 0.73 $\pm$ 0.02  | 0.80 $\pm$ 0.03                  | 0.72 $\pm$ 0.02    | 0.76 $\pm$ 0.02  |
| brainstem                 | 30                   | 1.53 $\pm$ 0.07                | 1.57 $\pm$ 0.05    | 1.56 $\pm$ 0.11  | 1.54 $\pm$ 0.04                  | 1.61 $\pm$ 0.06    | 1.63 $\pm$ 0.06  |
|                           | 60                   | 1.40 $\pm$ 0.03                | 1.37 $\pm$ 0.04    | 1.37 $\pm$ 0.02  | 1.43 $\pm$ 0.05                  | 1.39 $\pm$ 0.03    | 1.39 $\pm$ 0.02  |
|                           | 100                  | 1.24 $\pm$ 0.04                | 1.26 $\pm$ 0.04    | 1.30 $\pm$ 0.02  | 1.29 $\pm$ 0.04                  | 1.31 $\pm$ 0.04    | 1.30 $\pm$ 0.03  |
|                           | 150                  | 1.09 $\pm$ 0.01                | 1.15 $\pm$ 0.03    | 1.15 $\pm$ 0.03  | 1.20 $\pm$ 0.04                  | 1.17 $\pm$ 0.03    | 1.19 $\pm$ 0.02  |

Data represent mean  $\pm$  SE obtained from 5-9 animals in each treatment group for each age and sex. Results of multivariate ANOVA are provided in the main text. Note that the assays for each region and age were run in separate experiments, so absolute values cannot be compared strictly across ages or between regions. Accordingly, statistical comparisons in the main text were conducted on log-transformed data, which evaluates the treatment differences as a proportion to control values, rather than as an arithmetic difference. Representing the data as proportional differences (percent control) enables a full comparison of treatment effects and treatment interactions with all the other variables, even though absolute values for the controls cannot be compared across regions and ages.

**TABLE S4: HC3/ChAT ratio (mean  $\pm$  SE)**

| Region                    | Postnatal Age (days) | Male           |                    |                  | Female         |                    |                  |
|---------------------------|----------------------|----------------|--------------------|------------------|----------------|--------------------|------------------|
|                           |                      | Control        | Diazinon 0.5 mg/kg | Diazinon 1 mg/kg | Control        | Diazinon 0.5 mg/kg | Diazinon 1 mg/kg |
| frontal/parietal cortex   | 30                   | 21.0 $\pm$ 1.2 | 18.9 $\pm$ 0.8     | 19.5 $\pm$ 0.8   | 22.0 $\pm$ 1.2 | 19.3 $\pm$ 1.5     | 18.0 $\pm$ 1.0   |
|                           | 60                   | 21.9 $\pm$ 1.1 | 22.0 $\pm$ 1.2     | 18.9 $\pm$ 1.4   | 21.4 $\pm$ 1.6 | 19.4 $\pm$ 1.1     | 21.4 $\pm$ 0.9   |
|                           | 100                  | 20.0 $\pm$ 1.0 | 22.3 $\pm$ 1.4     | 19.3 $\pm$ 0.7   | 22.9 $\pm$ 1.5 | 20.5 $\pm$ 1.1     | 20.4 $\pm$ 1.1   |
|                           | 150                  | 22.4 $\pm$ 1.1 | 22.0 $\pm$ 1.4     | 22.1 $\pm$ 0.9   | 21.6 $\pm$ 1.4 | 22.1 $\pm$ 0.8     | 22.3 $\pm$ 0.8   |
| temporal/occipital cortex | 30                   | 20.5 $\pm$ 0.9 | 18.8 $\pm$ 1.8     | 17.4 $\pm$ 0.7   | 20.8 $\pm$ 0.5 | 21.4 $\pm$ 1.6     | 18.8 $\pm$ 0.9   |
|                           | 60                   | 16.2 $\pm$ 1.7 | 14.6 $\pm$ 0.8     | 12.8 $\pm$ 0.8   | 16.2 $\pm$ 1.2 | 15.1 $\pm$ 1.3     | 16.3 $\pm$ 1.1   |
|                           | 100                  | 19.4 $\pm$ 1.3 | 20.5 $\pm$ 1.2     | 16.7 $\pm$ 0.5   | 20.5 $\pm$ 1.1 | 17.9 $\pm$ 0.9     | 18.1 $\pm$ 0.9   |
|                           | 150                  | 18.8 $\pm$ 0.9 | 16.4 $\pm$ 0.9     | 16.5 $\pm$ 0.6   | 18.0 $\pm$ 0.7 | 16.9 $\pm$ 0.7     | 17.7 $\pm$ 1.0   |
| hippocampus               | 30                   | 21.7 $\pm$ 1.5 | 19.8 $\pm$ 1.6     | 20.0 $\pm$ 1.3   | 20.4 $\pm$ 1.4 | 20.3 $\pm$ 2.2     | 17.9 $\pm$ 1.2   |
|                           | 60                   | 19.7 $\pm$ 1.1 | 18.2 $\pm$ 0.9     | 14.3 $\pm$ 0.6   | 18.0 $\pm$ 1.3 | 16.6 $\pm$ 0.9     | 17.1 $\pm$ 0.8   |
|                           | 100                  | 21.3 $\pm$ 1.5 | 21.9 $\pm$ 1.3     | 21.2 $\pm$ 1.1   | 23.4 $\pm$ 1.5 | 23.7 $\pm$ 1.3     | 20.4 $\pm$ 1.1   |
|                           | 150                  | 20.2 $\pm$ 1.1 | 18.3 $\pm$ 1.1     | 16.6 $\pm$ 0.7   | 17.9 $\pm$ 0.9 | 17.0 $\pm$ 1.0     | 18.0 $\pm$ 1.3   |
| striatum                  | 30                   | 50 $\pm$ 3     | 44 $\pm$ 4         | 47 $\pm$ 3       | 42 $\pm$ 6     | 41 $\pm$ 4         | 42 $\pm$ 4       |
|                           | 60                   | 37 $\pm$ 2     | 37 $\pm$ 3         | 34 $\pm$ 2       | 41 $\pm$ 2     | 34 $\pm$ 1         | 34 $\pm$ 2       |
|                           | 100                  | 37 $\pm$ 3     | 39 $\pm$ 2         | 36 $\pm$ 3       | 37 $\pm$ 2     | 35 $\pm$ 2         | 38 $\pm$ 2       |
|                           | 150                  | 38 $\pm$ 3     | 37 $\pm$ 2         | 36 $\pm$ 2       | 40 $\pm$ 2     | 39 $\pm$ 2         | 33 $\pm$ 2       |
| midbrain                  | 30                   | 23.1 $\pm$ 2.0 | 24.2 $\pm$ 1.4     | 18.5 $\pm$ 1.1   | 22.0 $\pm$ 1.3 | 19.6 $\pm$ 1.1     | 20.2 $\pm$ 1.2   |
|                           | 60                   | 21.1 $\pm$ 1.5 | 21.2 $\pm$ 1.1     | 18.8 $\pm$ 0.9   | 20.9 $\pm$ 1.7 | 19.1 $\pm$ 1.4     | 18.3 $\pm$ 1.0   |
|                           | 100                  | 17.7 $\pm$ 0.9 | 16.3 $\pm$ 0.7     | 16.2 $\pm$ 0.7   | 17.4 $\pm$ 1.3 | 15.3 $\pm$ 1.1     | 15.6 $\pm$ 0.9   |
|                           | 150                  | 19.6 $\pm$ 1.3 | 18.3 $\pm$ 1.0     | 18.8 $\pm$ 1.0   | 19.1 $\pm$ 1.5 | 18.8 $\pm$ 0.9     | 17.6 $\pm$ 0.8   |
| brainstem                 | 30                   | 6.9 $\pm$ 0.6  | 6.1 $\pm$ 0.3      | 5.7 $\pm$ 0.6    | 6.6 $\pm$ 0.2  | 5.7 $\pm$ 0.5      | 5.4 $\pm$ 0.3    |
|                           | 60                   | 6.9 $\pm$ 0.3  | 5.7 $\pm$ 0.2      | 6.8 $\pm$ 0.3    | 6.2 $\pm$ 0.3  | 6.9 $\pm$ 0.2      | 7.0 $\pm$ 0.2    |
|                           | 100                  | 7.0 $\pm$ 0.4  | 6.6 $\pm$ 0.5      | 6.1 $\pm$ 0.2    | 6.5 $\pm$ 0.5  | 6.1 $\pm$ 0.6      | 5.9 $\pm$ 0.4    |
|                           | 150                  | 6.6 $\pm$ 0.1  | 6.5 $\pm$ 0.6      | 6.4 $\pm$ 0.5    | 5.9 $\pm$ 0.3  | 6.2 $\pm$ 0.5      | 5.8 $\pm$ 0.4    |

Data represent mean  $\pm$  SE obtained from 5-9 animals in each treatment group for each age and sex. Results of multivariate ANOVA are provided in the main text. Note that the assays for each region and age were run in separate experiments, so absolute values cannot be compared strictly across ages or between regions. Accordingly, statistical comparisons in the main text were conducted on log-transformed data, which evaluates the treatment differences as a proportion to control values, rather than as an arithmetic difference. Representing the data as proportional differences (percent control) enables a full comparison of treatment effects and treatment interactions with all the other variables, even though absolute values for the controls cannot be compared across regions and ages.

**TABLE S5: nAChR Binding (mean ± SE)**

| Region                    | Postnatal Age (days) | Male (fmol/mg protein) |                    |                  | Female (fmol/mg protein) |                    |                  |
|---------------------------|----------------------|------------------------|--------------------|------------------|--------------------------|--------------------|------------------|
|                           |                      | Control                | Diazinon 0.5 mg/kg | Diazinon 1 mg/kg | Control                  | Diazinon 0.5 mg/kg | Diazinon 1 mg/kg |
| frontal/parietal cortex   | 30                   | 67 ± 2                 | 69 ± 2             | 62 ± 3           | 73 ± 2                   | 63 ± 5             | 61 ± 3           |
|                           | 60                   | 64 ± 3                 | 66 ± 6             | 55 ± 4           | 62 ± 4                   | 54 ± 3             | 51 ± 2           |
|                           | 100                  | 53 ± 2                 | 53 ± 3             | 53 ± 3           | 52 ± 1                   | 49 ± 1             | 46 ± 2           |
|                           | 150                  | 48 ± 2                 | 46 ± 2             | 47 ± 3           | 46 ± 2                   | 44 ± 3             | 45 ± 2           |
| temporal/occipital cortex | 30                   | 72 ± 2                 | 80 ± 5             | 64 ± 5           | 79 ± 4                   | 73 ± 5             | 75 ± 4           |
|                           | 60                   | 73 ± 4                 | 66 ± 4             | 64 ± 4           | 75 ± 5                   | 65 ± 4             | 61 ± 3           |
|                           | 100                  | 55 ± 2                 | 57 ± 2             | 52 ± 2           | 53 ± 2                   | 52 ± 2             | 53 ± 3           |
|                           | 150                  | 57 ± 3                 | 52 ± 3             | 50 ± 2           | 54 ± 3                   | 49 ± 2             | 51 ± 3           |
| hippocampus               | 30                   | 47 ± 2                 | 48 ± 4             | 47 ± 3           | 52 ± 3                   | 47 ± 2             | 48 ± 4           |
|                           | 60                   | 41 ± 2                 | 43 ± 2             | 36 ± 2           | 39 ± 3                   | 35 ± 2             | 34 ± 2           |
|                           | 100                  | 33 ± 1                 | 33 ± 2             | 31 ± 1           | 30 ± 1                   | 28 ± 1             | 30 ± 1           |
|                           | 150                  | 31 ± 2                 | 31 ± 2             | 27 ± 2           | 29 ± 1                   | 27 ± 2             | 27 ± 2           |
| midbrain                  | 30                   | 83 ± 4                 | 97 ± 4             | 69 ± 2           | 86 ± 2                   | 79 ± 3             | 83 ± 4           |
|                           | 60                   | 79 ± 2                 | 88 ± 5             | 72 ± 3           | 77 ± 3                   | 76 ± 4             | 72 ± 2           |
|                           | 100                  | 60 ± 2                 | 59 ± 2             | 54 ± 3           | 57 ± 2                   | 55 ± 1             | 56 ± 3           |
|                           | 150                  | 66 ± 3                 | 67 ± 5             | 61 ± 4           | 67 ± 4                   | 64 ± 4             | 61 ± 4           |
| brainstem                 | 30                   | 40 ± 2                 | 43 ± 2             | 37 ± 2           | 40 ± 2                   | 36 ± 2             | 36 ± 1           |
|                           | 60                   | 35 ± 1                 | 32 ± 2             | 37 ± 1           | 35 ± 1                   | 34 ± 2             | 33 ± 1           |
|                           | 100                  | 31 ± 1                 | 31 ± 1             | 30 ± 1           | 30 ± 1                   | 29 ± 1             | 28 ± 2           |
|                           | 150                  | 26 ± 1                 | 28 ± 2             | 25 ± 2           | 26 ± 1                   | 25 ± 1             | 24 ± 1           |

Data represent mean ± SE obtained from 5-9 animals in each treatment group for each age and sex. Results of multivariate ANOVA are provided in the main text. Note that the assays for each region and age were run in separate experiments, so absolute values cannot be compared strictly across ages or between regions. Accordingly, statistical comparisons in the main text were conducted on log-transformed data, which evaluates the treatment differences as a proportion to control values, rather than as an arithmetic difference. Representing the data as proportional differences (percent control) enables a full comparison of treatment effects and treatment interactions with all the other variables, even though absolute values for the controls cannot be compared across regions and ages.

**TABLE S6: 5HT Receptor Binding (mean ± SE)**

| Subtype and Region                | Postnatal Age (days) | Male (fmol/mg protein) |                    |                  | Female (fmol/mg protein) |                    |                  |
|-----------------------------------|----------------------|------------------------|--------------------|------------------|--------------------------|--------------------|------------------|
|                                   |                      | Control                | Diazinon 0.5 mg/kg | Diazinon 1 mg/kg | Control                  | Diazinon 0.5 mg/kg | Diazinon 1 mg/kg |
| <b>5HT<sub>1A</sub> Receptors</b> |                      |                        |                    |                  |                          |                    |                  |
| frontal/parietal cortex           | 30                   | 119 ± 9                | 107 ± 12           | 104 ± 14         | 139 ± 7                  | 110 ± 15           | 93 ± 9           |
|                                   | 60                   | 93 ± 10                | 100 ± 21           | 56 ± 7           | 109 ± 13                 | 67 ± 10            | 75 ± 7           |
|                                   | 100                  | 63 ± 4                 | 59 ± 3             | 60 ± 6           | 66 ± 6                   | 61 ± 4             | 57 ± 5           |
|                                   | 150                  | 65 ± 5                 | 49 ± 6             | 47 ± 3           | 66 ± 5                   | 59 ± 6             | 56 ± 5           |
| temporal/occipital cortex         | 30                   | 125 ± 6                | 136 ± 19           | 102 ± 13         | 141 ± 16                 | 127 ± 11           | 127 ± 9          |
|                                   | 60                   | 99 ± 12                | 71 ± 10            | 74 ± 11          | 104 ± 11                 | 85 ± 11            | 86 ± 10          |
|                                   | 100                  | 59 ± 5                 | 68 ± 6             | 56 ± 5           | 65 ± 4                   | 60 ± 5             | 59 ± 4           |
|                                   | 150                  | 82 ± 6                 | 58 ± 6             | 61 ± 7           | 81 ± 10                  | 57 ± 4             | 73 ± 11          |
| midbrain                          | 30                   | 64 ± 8                 | 77 ± 7             | 48 ± 9           | 78 ± 4                   | 66 ± 10            | 67 ± 6           |
|                                   | 60                   | 47 ± 3                 | 49 ± 6             | 36 ± 3           | 41 ± 5                   | 41 ± 6             | 47 ± 6           |
|                                   | 100                  | 28 ± 1                 | 25 ± 1             | 25 ± 1           | 26 ± 2                   | 26 ± 2             | 24 ± 2           |
|                                   | 150                  | 22 ± 1                 | 23 ± 2             | 24 ± 2           | 28 ± 1                   | 22 ± 1             | 20 ± 1           |
| brainstem                         | 30                   | 41 ± 3                 | 37 ± 4             | 37 ± 5           | 43 ± 2                   | 33 ± 3             | 38 ± 3           |
|                                   | 60                   | 30 ± 3                 | 22 ± 1             | 33 ± 4           | 28 ± 2                   | 29 ± 3             | 27 ± 2           |
|                                   | 100                  | 25 ± 2                 | 27 ± 2             | 20 ± 2           | 25 ± 2                   | 23 ± 2             | 26 ± 2           |
|                                   | 150                  | 17 ± 1                 | 17 ± 2             | 17 ± 1           | 17 ± 1                   | 16 ± 1             | 19 ± 1           |
| <b>5HT<sub>2</sub> Receptors</b>  |                      |                        |                    |                  |                          |                    |                  |
| frontal/parietal cortex           | 30                   | 187 ± 6                | 175 ± 9            | 184 ± 5          | 179 ± 6                  | 183 ± 4            | 189 ± 5          |
|                                   | 60                   | 181 ± 6                | 183 ± 4            | 171 ± 4          | 175 ± 6                  | 179 ± 5            | 171 ± 5          |
|                                   | 100                  | 167 ± 8                | 160 ± 6            | 165 ± 7          | 161 ± 6                  | 164 ± 4            | 152 ± 5          |
|                                   | 150                  | 155 ± 4                | 161 ± 5            | 165 ± 5          | 167 ± 4                  | 159 ± 6            | 157 ± 4          |
| temporal/occipital cortex         | 30                   | 96 ± 4                 | 93 ± 3             | 97 ± 4           | 98 ± 5                   | 103 ± 5            | 103 ± 4          |
|                                   | 60                   | 85 ± 3                 | 89 ± 5             | 88 ± 3           | 86 ± 2                   | 91 ± 4             | 90 ± 4           |
|                                   | 100                  | 94 ± 3                 | 88 ± 2             | 88 ± 2           | 98 ± 3                   | 92 ± 4             | 89 ± 2           |
|                                   | 150                  | 70 ± 2                 | 76 ± 2             | 78 ± 3           | 79 ± 3                   | 82 ± 3             | 78 ± 2           |
| midbrain                          | 30                   | 25 ± 1                 | 26 ± 2             | 26 ± 1           | 24 ± 1                   | 27 ± 1             | 29 ± 2           |
|                                   | 60                   | 17 ± 1                 | 23 ± 2             | 19 ± 1           | 21 ± 1                   | 21 ± 1             | 21 ± 2           |
|                                   | 100                  | 21 ± 1                 | 19 ± 2             | 24 ± 2           | 21 ± 1                   | 19 ± 1             | 21 ± 1           |
|                                   | 150                  | 20 ± 2                 | 21 ± 1             | 22 ± 1           | 22 ± 1                   | 23 ± 1             | 22 ± 1           |
| brainstem                         | 30                   | 24 ± 1                 | 25 ± 1             | 24 ± 1           | 23 ± 1                   | 24 ± 1             | 25 ± 1           |
|                                   | 60                   | 18 ± 1                 | 17 ± 1             | 20 ± 1           | 21 ± 1                   | 19 ± 1             | 23 ± 1           |
|                                   | 100                  | 19 ± 1                 | 18 ± 1             | 19 ± 1           | 19 ± 1                   | 17 ± 1             | 19 ± 1           |
|                                   | 150                  | 15 ± 1                 | 19 ± 2             | 17 ± 1           | 17 ± 1                   | 18 ± 1             | 17 ± 2           |

Data represent mean ± SE obtained from 5-9 animals in each treatment group for each age and sex. Results of multivariate ANOVA are provided in the main text. Note that the assays for each region and age were run in separate experiments, so absolute values cannot be compared strictly across ages or between regions. Accordingly, statistical comparisons in the main text were conducted on log-transformed data, which evaluates the treatment differences as a proportion to control values, rather than as an arithmetic difference. Representing the data as proportional differences (percent control) enables a full comparison of treatment effects and treatment interactions with all the other variables, even though absolute values for the controls cannot be compared across regions and ages.
